# Supplementary material for: Identification of Chromosomal Regions and Candidate Genes for Round leaf Locus in Cucumis melo L.
Source: MDPI journal article supplement (doi:10.3390/plants13081134), 2024-04-18
Supplement: s1 [file s1]

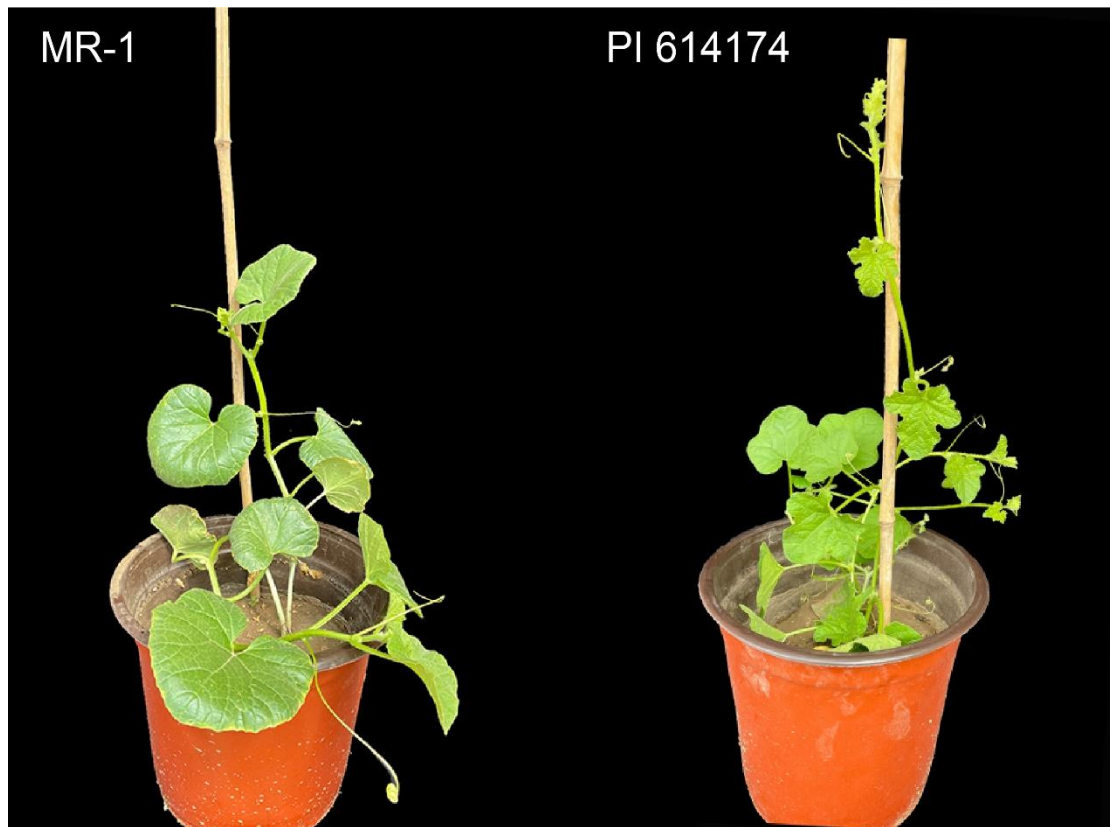

**Figure S1.** Whole-plant diagrams of the development of MR-1 and PI 614174.

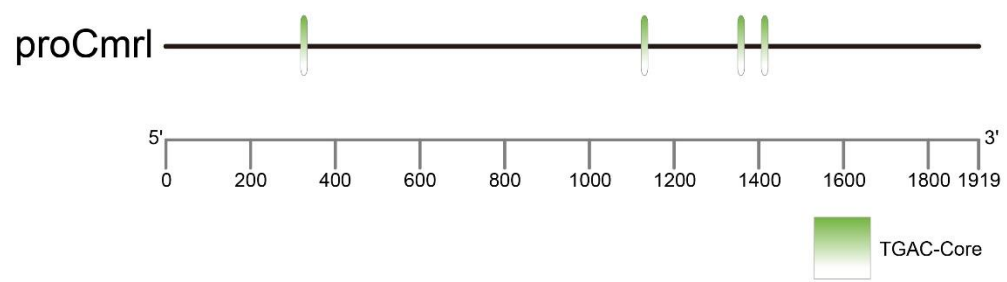

**Figure S2.** Distribution of TGAC core *cis*-acting elements on the *MELO3C019152.2* promoter.
