# Supplementary material for: Identification of Chromosomal Regions and Candidate Genes for Round leaf Locus in Cucumis melo L
Source: Plants (Basel). 2024 Apr 18;13(8):1134. doi: 10.3390/plants13081134 (PMC11054961; doi:10.3390/plants13081134)
Supplement: Supplementary file 1 [file plants-13-01134-s001.zip › Supplementary Tables.xlsx]

## Sheet: Table S1
Table S1. Information of 5 predicted genes in 80.27 kb candidate region of the Cmrl locus (DHL92 v3.6.1)
Gene ID	# nsSNPs*	Physical location on Chr8	Gene annotation
MELO3C019151.2	0	Chr08: 14,593,641-14,593,898	A-kinase anchor protein 12
MELO3C019152.2	1	Chr08: 14,622,368-14,624,494	Pentatricopeptide repeat-containing family protein
MELO3C033243.2	0	Chr08: 14,624,568-14,629,886	Mutator-like transposase
MELO3C019153.2	0	Chr08: 14,629,731-14,629,880	Unknown protein
MELO3C019154.2	0	Chr08: 14,651,087-14,651,332	kinesin-related protein 4 isoform X1
nsSNP, non-synonymous single nucleotide polymorphism. * Within coding sequences between two parental lines

## Sheet: Table S2
Table S2. Primers sequence for initial mapping processes(DHL92 v3.6.1)
Primers name	Primers sequence (5’ to 3’)	Type	Purpose
Chr8_11019720	F:CCGAATGAGAAGAGGATTATGATTC	InDel	Initial mapping
	R:GAAGAAGGAGAAGACGCTGAC
Chr8_12006382	F:GCATACCTATTCCTAACGACTTCAT	CAPS
	R:CTTCAATCTTGTGGCTTCATCCT
Chr8_12524048	F:GCTGTTCAACTCTAATCCGTCAA	CAPS
	R:GCATTCTGTATCTCGCTGTGTT
Chr8_12708667	F:GTGAGGATTGGAGTCAGACATTG	CAPS
	R:TTGGAGTGATAGTAGGCGAGAAT
Chr8_13267406	F:GTACGCTCTAAAGCATCATAGTTG	CAPS
	R:GCCACATTCATATAGTGTCATCAAG
Chr8_14006406	F:CGTTGGAGGTTGTATGAGAATTG	CAPS
	R:CCAGGTATTGACAGGACTCTTAC
Chr8_14137876	F:AGAATGTTCGTAGTGGTGAATGAG	CAPS
	R:GGCTTCTTCTGTCTATACATCAACT
Chr8_14544142	F:CATAGTCATGGAACTAAGGTCACA	CAPS
	R:TCTTCCTCTCTCCTTTATTCTTCTC
Chr8_14674941	F:GTCTGGTAAGGAGTCTGCGATA	CAPS
	R:TGAAACCGAGCGTTGATATGC
Chr8_15012223	F:GAACCTCTATGGATCAATGACAGT	CAPS
	R:GCTCAACATCGCTTGCCTAA
Chr8_16004456	F:CTCGTAAGAGAGAATGATTAGGATC	CAPS
	R:TTGGATTGGAGTAGCCAAATGT
Chr8_16619374	F:GGCATTATTGGTATTTCCTCAAGAC	CAPS
	R:GCGATAGAATTTATGTTGTCAGTGC
Chr8_17014229	F:AGAGCCAAGAACTATTGACATATCG	CAPS
	R:GCTTCAACCAGAACTCACACTT
Chr8_18186415	F:CGTTTCAATACAAAATTCAACTCAA	InDel
	R:AATAAAATACAATTTTGGAAAAGGG
Chr8_19011191	F:ACCCAACTCACCGAACACT	CAPS
	R:CTCGTTGAGAAGGTTAGTATTGTG

## Sheet: Table S3
Table S3. Primers sequence for fine mapping processes (DHL92 v3.6.1)
Primers name	Primers sequence (5’ to 3’)	Type	Purpose
Chr8_14183339	F:GTAGCAAGCACATCCCTCCTA	CAPS	Fine mapping
	R:AACCCATCTGGCAGTTTAAGC
Chr8_14236131	F:GGAGATCATCCATGAATGTGGTTAT	CAPS
	R:ACACAGTCTAAACGATCTTGTACC
Chr8_14376918	F:CAGTTAGAGGCATAGATTAGAAGAC	CAPS
	R:GTCATCTACTGGACATAGCACAA
Chr8_14382154	F:TGCTTGAACTTGTGCTTCTACT	CAPS
	R:TTGACGAGATCACTGCATACTT
Chr8_14508207	F:TTGAAGACATGGTTGACGGG	InDel
	R:AGTTGAGAGAGGAGGAGGCG
Chr8_14555830	F:GGTCCTACGCTCTCATTG	CAPS
	R:GCTTCCGAGTATGAATCCA
Chr8_14574340	F:TGGACTCTGCCTGTTGCTT	CAPS
	R:ACATTCATCGTTAGTGCTTGGT
Chr8_14578629	X:GAAGGTGACCAAGTTCATGCTCTCTATGATTGCATTTTCATCCCTCTA	KASP
	Y:GAAGGTCGGAGTCAACGGATTTCTATGATTGCATTTTCATCCCTCTG
	C:AAACCCCATTTTGTGTAAAATGTAGAACAAC
Chr8_14593785	X:GAAGGTGACCAAGTTCATGCTTTTAAGGGGACTGTAGATTCTGTTG	KASP
	Y:GAAGGTCGGAGTCAACGGATTGTTTAAGGGGACTGTAGATTCTGTTA
	C:AACATTTCTCTATCAACGTCAACCATGC
Chr8_14654609	X:GAAGGTGACCAAGTTCATGCTAATCTTAAGTCCACATACTCTCCAC	KASP
	Y:GAAGGTCGGAGTCAACGGATTGAATCTTAAGTCCACATACTCTCCAT
	C:AAATTAGGTAAAACTATAAAGACATTTCGATCAG

## Sheet: Table S4
Table S4. Melon accessions used in this research
NO.	Accessions	Leaf morphology	Source
1	MR-1	Round	[50] /Laboratory Maintained
2	M4-116	Round	[50] /Laboratory Maintained
3	X147	Round	[50] /Laboratory Maintained
4	M4-83	Round	[50] /Laboratory Maintained
5	17M51-4	Round	[50] /Laboratory Maintained
6	PI 614174	Deeply lobed	[50] /U.S. National Plant Germplasm System
7	M4-5	Deeply lobed	[50] /Laboratory Maintained
8	M1-15	Deeply lobed	[50] /Laboratory Maintained
9	X122	Deeply lobed	[50] /Laboratory Maintained
10	X060	Deeply lobed	[50] /Laboratory Maintained
11	M1-96	Deeply lobed	[50] /Laboratory Maintained
12	M1-38	Deeply lobed	[50] /Laboratory Maintained

## Sheet: Table S5
Table S5. Primers sequence for qRT-PCR and cloning
Primers name	Primers sequence (5’ to 3’)	Purpose
MELO3C019151.2	F:TGAAAGCTCTAGGTGCCACT	Gene expression
	R:AGCAGGAACGTGGCTAATTC
MELO3C019152.2	F:AGGGATAGGCATGTGAGCAA
	R:TCAGAATGCTCAGGGTGTCC
MELO3C019153.2	F:GACGACTCGAGGATGGTGAT
	R:GTCGTCAAGTCGGTTCGTTT						1
MELO3C019154.2	F:TTTGGTCTCGGCCCAGTTCT
	R:AAACGAGGCTCGGGTTGAAA
MELO3C033243.2	F:GTCGTCAAGTCGGTTCGTTT
	R:GACGACTCGAGGATGGTGAT
Actin	F:CACCATCGGAGCTGAGAGAT
	R:TCCTGCAGCTTCCATACCAA
MELO3C019151.2-CDS	F:ATGGAAGAGCGTATCTTTAATAAGATAGC	Cloning
	R:TCAATCCTCTGCTCTTTTTTTAAGC
MELO3C019152.2-CDS	F:ATGTTCTCTGGATTAATGTTCTTCCG
	R:TCACCAATAATCCTGGCAAGAGC
MELO3C019152.2-Pro	F:GATGAGGGTTTAAATTTTGAACTTGG
	R:TTGAATACCCAGGTTGAAAAAAACA
MELO3C019153.2-CDS	F:ATGAAGATGACGCGACCGG
	R:CTACTCATTTTCGTGCAAGTCGTT
MELO3C019154.2-CDS	F:ATGACGCAGCTGATCCCGG
	R:TCAGACGAAGTGCGCCTCG
MELO3C033243.2-CDS	F:ATGACCAATCTCATTCACCCCTA
	R:TTAACGATGAAGATGACGCGAC

## Sheet: Table S6
Table S6. Primers sequence for vectors construction in this study (DHL92 v3.6.1)
Primers name	Primers sequence (5’ to 3’)	Purpose
Cmppr-GFP	F:AGCAGGCTTTGACTTTATGTTCTCTGGATTAATGTTCTTCCG	Subcellular localization
	R:TGGGTCTAGAGACTTCCAATAATCCTGGCAAGAGCA
